# Supplementary material
Source: HighWire-hosted journal article supplement (https://www.canjsurg.ca/highwire/filestream/98544/field_highwire_adjunct_files/0/CJS-019920-at-1.pdf)

**Appendix 1** to Mercier É, Nadeau A, Le Sage N, et al. A Canadian consensus-based list of urgent and specialized in-hospital trauma care interventions to assess the accuracy of prehospital trauma triage protocols: a modified Delphi study. *Can J Surg* 2023. Copyright © 2023 The Author(s) or their employer(s). To receive this resource in an accessible format, please contact us at [cmajgroup@cmaj.ca](mailto:cmajgroup@cmaj.ca).

DOI: 10.1503/cjs.019920

*Online appendices are unedited and posted as supplied by the authors.*

## Appendix 1. Example of an intervention presented to each panelist for rating.

This example is during the second round and includes the presentation of the first round results for the same intervention. Thereafter, the panelist was requested to provide his/her opinion using the 9-point likert scale.

Q4

 Customize  Save as ▼

Knowing the results of the second round, please rate your opinion again on the following statement: Following a trauma, patients who will require an orthopedic surgery for a limb injury (excluding femur, hip fracture or amputation) within 24 hours should be transported directly to the trauma centre with the highest designation (usually level 1 or 2) within the catchment area.

Answered: 19 Skipped: 0

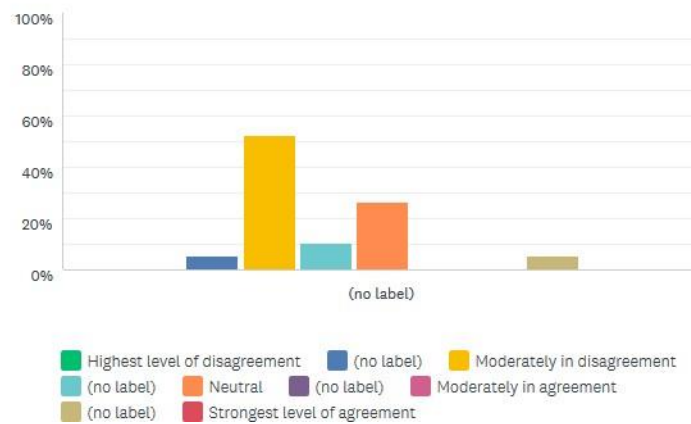

Supplement: CJS-019920-at-1.pdf [file CJS-019920-at-1.pdf]
